# Supplementary material
Source: publisher figshare collection journal article supplement (https://acs.figshare.com/ndownloader/files/4461076)
Supplement: Supplementary file 1 [file 4461076]

 
data_dixie76
 
_audit_creation_method            SHELXL-97
_chemical_name_systematic
;
 ?
;
_chemical_name_common             ?
_chemical_melting_point           ?
_chemical_formula_moiety          ?
_chemical_formula_sum
 'Mo3 O12 Rb4 Zn'
_chemical_formula_weight          887.07
 
loop_
 _atom_type_symbol
 _atom_type_description
 _atom_type_scat_dispersion_real
 _atom_type_scat_dispersion_imag
 _atom_type_scat_source
 'O'  'O'   0.0106   0.0060
 'International Tables Vol C Tables 4.2.6.8 and 6.1.1.4'
 'Zn'  'Zn'   0.2839   1.4301
 'International Tables Vol C Tables 4.2.6.8 and 6.1.1.4'
 'Rb'  'Rb'  -0.9393   2.9676
 'International Tables Vol C Tables 4.2.6.8 and 6.1.1.4'
 'Mo'  'Mo'  -1.6832   0.6857
 'International Tables Vol C Tables 4.2.6.8 and 6.1.1.4'
 
_symmetry_cell_setting            'orthorhombic'
_symmetry_space_group_name_H-M    'Pbca'
 
loop_
 _symmetry_equiv_pos_as_xyz
 'x, y, z'
 '-x+1/2, -y, z+1/2'
 'x+1/2, -y+1/2, -z'
 '-x, y+1/2, -z+1/2'
 '-x, -y, -z'
 'x-1/2, y, -z-1/2'
 '-x-1/2, y-1/2, z'
 'x, -y-1/2, z-1/2'
 
_cell_length_a                    12.485(2)
_cell_length_b                    10.8750(10)
_cell_length_c                    22.2660(10)
_cell_angle_alpha                 90.00
_cell_angle_beta                  90.00
_cell_angle_gamma                 90.00
_cell_volume                      3023.2(6)
_cell_formula_units_Z             8
_cell_measurement_temperature     293(2)
_cell_measurement_reflns_used     ?
_cell_measurement_theta_min       2.45
_cell_measurement_theta_max       30.02
 
_exptl_crystal_description        'plate-shaped fragment'
_exptl_crystal_colour             'blue-green'
_exptl_crystal_size_max           0.13
_exptl_crystal_size_mid           0.10
_exptl_crystal_size_min           0.05
_exptl_crystal_density_meas       ?
_exptl_crystal_density_diffrn     3.898
_exptl_crystal_density_method     'not measured'
_exptl_crystal_F_000              3200
_exptl_absorpt_coefficient_mu     16.843
_exptl_absorpt_correction_type    'multi-scan'
_exptl_absorpt_correction_T_min   0.2273
_exptl_absorpt_correction_T_max   0.4864
_exptl_absorpt_process_details    ?
 
_exptl_special_details
;
 ?
;
 
_diffrn_ambient_temperature       293(2)
_diffrn_radiation_wavelength      0.71073
_diffrn_radiation_type            MoK\a
_diffrn_radiation_source          'fine-focus sealed tube'
_diffrn_radiation_monochromator   graphite
_diffrn_measurement_device_type   'KappaCCD'
_diffrn_measurement_method        ' \w scans \k offsets'
_diffrn_detector_area_resol_mean  ?
_diffrn_standards_number          0
_diffrn_standards_interval_count  ?
_diffrn_standards_interval_time   ?
_diffrn_standards_decay_%         none
_diffrn_reflns_number             8235
_diffrn_reflns_av_R_equivalents   0.0535
_diffrn_reflns_av_sigmaI/netI     0.0624
_diffrn_reflns_limit_h_min        -17
_diffrn_reflns_limit_h_max        17
_diffrn_reflns_limit_k_min        -15
_diffrn_reflns_limit_k_max        15
_diffrn_reflns_limit_l_min        -31
_diffrn_reflns_limit_l_max        31
_diffrn_reflns_theta_min          2.45
_diffrn_reflns_theta_max          30.02
_reflns_number_total              4419
_reflns_number_gt                 2922
_reflns_threshold_expression      >2sigma(I)
 
_computing_data_collection        'COLLECT (Nonius, 2000)'
_computing_cell_refinement 'Denzo and Scalepack (Otwinowski & Minor, 1997)'
_computing_data_reduction  'Denzo and Scalepack (Otwinowski & Minor, 1997)'
_computing_structure_solution     'SHELXL-97 (Sheldrick, 1997)'
_computing_structure_refinement   'SHELXL-97 (Sheldrick, 1997)'
_computing_molecular_graphics     ?
_computing_publication_material   'SHELXL-97 (Sheldrick, 1997)'
 
_refine_special_details
;
 Refinement of F^2^ against ALL reflections.  The weighted R-factor wR and
 goodness of fit S are based on F^2^, conventional R-factors R are based
 on F, with F set to zero for negative F^2^. The threshold expression of
 F^2^ > 2sigma(F^2^) is used only for calculating R-factors(gt) etc. and is
 not relevant to the choice of reflections for refinement.  R-factors based
 on F^2^ are statistically about twice as large as those based on F, and R-
 factors based on ALL data will be even larger.
;
 
_refine_ls_structure_factor_coef  Fsqd
_refine_ls_matrix_type            full
_refine_ls_weighting_scheme       calc
_refine_ls_weighting_details
 'calc w=1/[\s^2^(Fo^2^)+(0.0394P)^2^+9.0735P] where P=(Fo^2^+2Fc^2^)/3'
_atom_sites_solution_primary      direct
_atom_sites_solution_secondary    difmap
_atom_sites_solution_hydrogens    ' '
_refine_ls_hydrogen_treatment     none
_refine_ls_extinction_method      SHELXL
_refine_ls_extinction_coef        0.000134(18)
_refine_ls_extinction_expression
 'Fc^*^=kFc[1+0.001xFc^2^\l^3^/sin(2\q)]^-1/4^'
_refine_ls_number_reflns          4419
_refine_ls_number_parameters      182
_refine_ls_number_restraints      0
_refine_ls_R_factor_all           0.0873
_refine_ls_R_factor_gt            0.0456
_refine_ls_wR_factor_ref          0.1062
_refine_ls_wR_factor_gt           0.0919
_refine_ls_goodness_of_fit_ref    1.032
_refine_ls_restrained_S_all       1.032
_refine_ls_shift/su_max           0.002
_refine_ls_shift/su_mean          0.000
 
loop_
 _atom_site_label
 _atom_site_type_symbol
 _atom_site_fract_x
 _atom_site_fract_y
 _atom_site_fract_z
 _atom_site_U_iso_or_equiv
 _atom_site_adp_type
 _atom_site_occupancy
 _atom_site_symmetry_multiplicity
 _atom_site_calc_flag
 _atom_site_refinement_flags
 _atom_site_disorder_assembly
 _atom_site_disorder_group
Mo01 Mo 0.37662(4) 0.74717(5) 0.90582(2) 0.00993(13) Uani 1 1 d . . .
Mo02 Mo 0.87294(4) 0.75407(5) 0.90704(2) 0.01007(13) Uani 1 1 d . . .
Mo03 Mo 0.37491(5) 0.42223(5) 0.73384(3) 0.01156(14) Uani 1 1 d . . .
Rb01 Rb 0.62709(5) 0.91860(6) 0.97183(3) 0.01378(15) Uani 1 1 d . . .
Rb02 Rb 0.87567(5) 1.08440(6) 1.03151(3) 0.01385(15) Uani 1 1 d . . .
Rb03 Rb 0.10545(6) 0.57003(6) 0.83948(3) 0.01477(15) Uani 1 1 d . . .
Rb04 Rb 0.62453(5) 0.59903(6) 0.84265(3) 0.01486(16) Uani 1 1 d . . .
Zn01 Zn 0.32067(7) 0.71724(7) 0.75429(3) 0.01259(18) Uani 1 1 d . . .
O1 O 0.3690(4) 0.7428(4) 0.6740(2) 0.0205(11) Uani 1 1 d . . .
O2 O 0.4986(4) 0.4614(4) 0.7629(2) 0.0165(10) Uani 1 1 d . . .
O3 O 0.3980(4) 0.7525(4) 0.82513(19) 0.0167(11) Uani 1 1 d . . .
O4 O 0.5121(4) 0.1802(4) 0.9333(2) 0.0188(11) Uani 1 1 d . . .
O5 O 0.2808(4) 0.5400(4) 0.75474(19) 0.0168(10) Uani 1 1 d . . .
O6 O 0.1704(4) 0.7760(4) 0.7622(2) 0.0178(10) Uani 1 1 d . . .
O7 O 0.2594(4) 0.6681(5) 0.9229(2) 0.0224(12) Uani 1 1 d . . .
O8 O 0.3683(4) 0.8969(4) 0.9333(2) 0.0201(11) Uani 1 1 d . . .
O9 O 0.3833(4) 0.4173(4) 0.65647(19) 0.0195(11) Uani 1 1 d . . .
O10 O 0.4851(4) 0.6700(4) 0.9381(2) 0.0206(11) Uani 1 1 d . . .
O11 O 0.6227(4) 0.4084(4) 0.92981(19) 0.0167(11) Uani 1 1 d . . .
O12 O 0.7585(4) 0.6840(4) 0.93782(19) 0.0174(11) Uani 1 1 d . . .
 
loop_
 _atom_site_aniso_label
 _atom_site_aniso_U_11
 _atom_site_aniso_U_22
 _atom_site_aniso_U_33
 _atom_site_aniso_U_23
 _atom_site_aniso_U_13
 _atom_site_aniso_U_12
Mo01 0.0118(3) 0.0101(3) 0.0080(3) 0.00017(19) -0.0003(2) -0.0005(2)
Mo02 0.0117(3) 0.0103(3) 0.0082(3) 0.0001(2) -0.0008(2) 0.0000(2)
Mo03 0.0122(3) 0.0101(3) 0.0124(3) -0.0004(2) -0.0004(2) -0.0001(2)
Rb01 0.0155(4) 0.0144(3) 0.0114(3) -0.0003(2) 0.0004(2) 0.0001(3)
Rb02 0.0141(4) 0.0142(3) 0.0132(3) 0.0010(2) -0.0005(2) 0.0001(3)
Rb03 0.0160(3) 0.0175(3) 0.0108(3) 0.0005(2) 0.0007(2) -0.0008(3)
Rb04 0.0171(4) 0.0176(3) 0.0099(3) -0.0003(2) 0.0004(3) -0.0029(3)
Zn01 0.0147(4) 0.0126(4) 0.0105(3) -0.0007(3) -0.0008(3) 0.0005(3)
O1 0.028(3) 0.025(3) 0.009(2) 0.001(2) -0.002(2) -0.004(2)
O2 0.014(3) 0.016(2) 0.020(2) -0.003(2) -0.004(2) -0.0019(19)
O3 0.023(3) 0.021(2) 0.006(2) 0.0009(18) -0.001(2) -0.007(2)
O4 0.017(3) 0.024(3) 0.016(2) -0.003(2) -0.001(2) -0.007(2)
O5 0.016(3) 0.013(2) 0.020(2) 0.0008(19) 0.004(2) 0.000(2)
O6 0.022(3) 0.012(2) 0.019(2) 0.002(2) 0.005(2) 0.000(2)
O7 0.018(3) 0.030(3) 0.020(2) 0.003(2) 0.000(2) -0.015(2)
O8 0.030(3) 0.014(2) 0.016(2) 0.0005(19) 0.005(2) 0.003(2)
O9 0.023(3) 0.023(3) 0.013(2) 0.000(2) -0.002(2) -0.003(2)
O10 0.022(3) 0.025(3) 0.015(2) 0.002(2) 0.001(2) 0.010(2)
O11 0.027(3) 0.008(2) 0.015(2) -0.0008(18) 0.002(2) 0.001(2)
O12 0.019(3) 0.023(3) 0.010(2) 0.004(2) -0.001(2) -0.003(2)
 
_geom_special_details
;
 All esds (except the esd in the dihedral angle between two l.s. planes)
 are estimated using the full covariance matrix.  The cell esds are taken
 into account individually in the estimation of esds in distances, angles
 and torsion angles; correlations between esds in cell parameters are only
 used when they are defined by crystal symmetry.  An approximate (isotropic)
 treatment of cell esds is used for estimating esds involving l.s. planes.
;
 
loop_
 _geom_bond_atom_site_label_1
 _geom_bond_atom_site_label_2
 _geom_bond_distance
 _geom_bond_site_symmetry_2
 _geom_bond_publ_flag
Mo01 O7 1.740(5) . ?
Mo01 O8 1.742(5) . ?
Mo01 O10 1.748(5) . ?
Mo01 O3 1.817(4) . ?
Mo01 Rb04 3.7621(10) . ?
Mo01 Rb03 3.8157(9) 7_665 ?
Mo01 Rb02 3.8665(9) 3_467 ?
Mo01 Rb02 3.9018(9) 5_677 ?
Mo01 Rb01 3.9261(9) . ?
Mo01 Rb03 4.1660(10) . ?
Mo02 O4 1.746(5) 7_765 ?
Mo02 O11 1.754(4) 7_765 ?
Mo02 O12 1.758(5) . ?
Mo02 O1 1.808(5) 6_657 ?
Mo02 Rb04 3.8102(9) . ?
Mo02 Rb03 3.8334(9) 1_655 ?
Mo02 Rb01 3.8347(9) . ?
Mo02 Rb02 3.8482(9) 5_777 ?
Mo02 Rb01 3.9230(9) 7_755 ?
Mo02 Rb04 4.0163(9) 7_765 ?
Mo03 O9 1.727(4) . ?
Mo03 O2 1.727(5) . ?
Mo03 O5 1.800(5) . ?
Mo03 O6 1.802(5) 7_655 ?
Mo03 Rb03 3.6787(10) 6_657 ?
Mo03 Rb04 3.9055(9) 4_646 ?
Mo03 Rb04 4.0459(9) 6_557 ?
Rb01 O9 2.860(4) 4_656 ?
Rb01 O8 2.915(5) 5_677 ?
Rb01 O4 2.939(5) 5_667 ?
Rb01 O7 3.018(5) 3_567 ?
Rb01 O12 3.126(5) . ?
Rb01 O11 3.263(5) 7_765 ?
Rb01 O4 3.300(5) 1_565 ?
Rb01 O12 3.309(5) 7_765 ?
Rb01 O10 3.319(5) . ?
Rb01 O8 3.352(5) . ?
Rb01 Rb02 3.8274(10) . ?
Rb02 O10 2.866(5) 7_765 ?
Rb02 O12 2.886(5) 7_765 ?
Rb02 O11 2.965(4) 7_765 ?
Rb02 O8 3.152(5) 5_677 ?
Rb02 O10 3.159(5) 3_567 ?
Rb02 O4 3.173(5) 3_567 ?
Rb02 O11 3.203(5) 3_567 ?
Rb02 O7 3.268(5) 3_567 ?
Rb02 O7 3.334(5) 5_677 ?
Rb02 Mo02 3.8482(9) 5_777 ?
Rb02 Mo01 3.8665(9) 3_567 ?
Rb03 O4 2.820(5) 7_665 ?
Rb03 O8 2.830(5) 7_655 ?
Rb03 O7 2.878(5) . ?
Rb03 O2 2.893(5) 6_557 ?
Rb03 O5 2.908(5) . ?
Rb03 O6 2.939(4) . ?
Rb03 O9 3.234(5) 6_557 ?
Rb03 O3 3.468(5) 7_655 ?
Rb03 O1 3.512(5) 6_557 ?
Rb03 Zn01 3.6581(11) . ?
Rb03 Mo03 3.6787(10) 6_557 ?
Rb03 Mo01 3.8157(9) 7_655 ?
Rb04 O2 2.805(5) . ?
Rb04 O11 2.840(4) . ?
Rb04 O12 2.853(5) . ?
Rb04 O10 2.853(5) . ?
Rb04 O5 2.986(5) 6_657 ?
Rb04 O6 3.079(5) 6_657 ?
Rb04 O3 3.307(5) . ?
Rb04 O1 3.450(5) 6_657 ?
Rb04 O9 3.463(5) 4_656 ?
Rb04 Zn01 3.5083(11) 6_657 ?
Zn01 O3 1.889(5) . ?
Zn01 O1 1.908(5) . ?
Zn01 O6 1.990(5) . ?
Zn01 O5 1.991(5) . ?
Zn01 Rb04 3.5083(10) 6_557 ?
O1 Mo02 1.808(5) 6_557 ?
O1 Rb04 3.450(5) 6_557 ?
O1 Rb03 3.512(5) 6_657 ?
O2 Rb03 2.893(5) 6_657 ?
O3 Rb03 3.468(5) 7_665 ?
O4 Mo02 1.746(5) 7_755 ?
O4 Rb03 2.820(5) 7_655 ?
O4 Rb01 2.939(5) 5_667 ?
O4 Rb02 3.173(5) 3_467 ?
O4 Rb01 3.300(5) 1_545 ?
O5 Rb04 2.986(5) 6_557 ?
O6 Mo03 1.802(5) 7_665 ?
O6 Rb04 3.079(5) 6_557 ?
O7 Rb01 3.018(5) 3_467 ?
O7 Rb02 3.268(5) 3_467 ?
O7 Rb02 3.334(5) 5_677 ?
O8 Rb03 2.830(5) 7_665 ?
O8 Rb01 2.915(5) 5_677 ?
O8 Rb02 3.152(5) 5_677 ?
O9 Rb01 2.860(4) 4_646 ?
O9 Rb03 3.234(5) 6_657 ?
O9 Rb04 3.463(5) 4_646 ?
O10 Rb02 2.866(5) 7_755 ?
O10 Rb02 3.159(5) 3_467 ?
O11 Mo02 1.754(4) 7_755 ?
O11 Rb02 2.965(4) 7_755 ?
O11 Rb02 3.203(5) 3_467 ?
O11 Rb01 3.263(5) 7_755 ?
O12 Rb02 2.886(5) 7_755 ?
O12 Rb01 3.309(5) 7_755 ?
 
loop_
 _geom_angle_atom_site_label_1
 _geom_angle_atom_site_label_2
 _geom_angle_atom_site_label_3
 _geom_angle
 _geom_angle_site_symmetry_1
 _geom_angle_site_symmetry_3
 _geom_angle_publ_flag
O7 Mo01 O8 109.6(2) . . ?
O7 Mo01 O10 109.0(2) . . ?
O8 Mo01 O10 110.5(2) . . ?
O7 Mo01 O3 110.9(2) . . ?
O8 Mo01 O3 109.0(2) . . ?
O10 Mo01 O3 107.9(2) . . ?
O7 Mo01 Rb04 124.23(18) . . ?
O8 Mo01 Rb04 125.49(17) . . ?
O10 Mo01 Rb04 46.42(15) . . ?
O3 Mo01 Rb04 61.52(16) . . ?
O7 Mo01 Rb03 126.07(18) . 7_665 ?
O8 Mo01 Rb03 43.88(15) . 7_665 ?
O10 Mo01 Rb03 123.74(17) . 7_665 ?
O3 Mo01 Rb03 65.11(15) . 7_665 ?
Rb04 Mo01 Rb03 101.60(2) . 7_665 ?
O7 Mo01 Rb02 57.15(18) . 3_467 ?
O8 Mo01 Rb02 138.15(15) . 3_467 ?
O10 Mo01 Rb02 53.58(17) . 3_467 ?
O3 Mo01 Rb02 112.78(15) . 3_467 ?
Rb04 Mo01 Rb02 74.818(18) . 3_467 ?
Rb03 Mo01 Rb02 176.41(2) 7_665 3_467 ?
O7 Mo01 Rb02 58.29(18) . 5_677 ?
O8 Mo01 Rb02 52.23(17) . 5_677 ?
O10 Mo01 Rb02 134.74(15) . 5_677 ?
O3 Mo01 Rb02 117.21(16) . 5_677 ?
Rb04 Mo01 Rb02 177.31(2) . 5_677 ?
Rb03 Mo01 Rb02 75.751(18) 7_665 5_677 ?
Rb02 Mo01 Rb02 107.831(18) 3_467 5_677 ?
O7 Mo01 Rb01 145.37(15) . . ?
O8 Mo01 Rb01 58.17(17) . . ?
O10 Mo01 Rb01 57.10(17) . . ?
O3 Mo01 Rb01 103.76(15) . . ?
Rb04 Mo01 Rb01 71.823(19) . . ?
Rb03 Mo01 Rb01 70.199(17) 7_665 . ?
Rb02 Mo01 Rb01 108.069(19) 3_467 . ?
Rb02 Mo01 Rb01 106.63(2) 5_677 . ?
O7 Mo01 Rb03 33.42(15) . . ?
O8 Mo01 Rb03 120.52(17) . . ?
O10 Mo01 Rb03 123.61(17) . . ?
O3 Mo01 Rb03 77.51(15) . . ?
Rb04 Mo01 Rb03 109.76(2) . . ?
Rb03 Mo01 Rb03 109.629(18) 7_665 . ?
Rb02 Mo01 Rb03 72.196(17) 3_467 . ?
Rb02 Mo01 Rb03 71.809(18) 5_677 . ?
Rb01 Mo01 Rb03 178.37(2) . . ?
O4 Mo02 O11 108.5(2) 7_765 7_765 ?
O4 Mo02 O12 109.8(2) 7_765 . ?
O11 Mo02 O12 109.1(2) 7_765 . ?
O4 Mo02 O1 109.0(2) 7_765 6_657 ?
O11 Mo02 O1 110.7(2) 7_765 6_657 ?
O12 Mo02 O1 109.7(2) . 6_657 ?
O4 Mo02 Rb04 126.29(16) 7_765 . ?
O11 Mo02 Rb04 123.88(16) 7_765 . ?
O12 Mo02 Rb04 45.04(14) . . ?
O1 Mo02 Rb04 64.70(16) 6_657 . ?
O4 Mo02 Rb03 42.99(15) 7_765 1_655 ?
O11 Mo02 Rb03 126.12(16) 7_765 1_655 ?
O12 Mo02 Rb03 122.84(16) . 1_655 ?
O1 Mo02 Rb03 66.03(16) 6_657 1_655 ?
Rb04 Mo02 Rb03 103.75(2) . 1_655 ?
O4 Mo02 Rb01 138.32(15) 7_765 . ?
O11 Mo02 Rb01 57.97(16) 7_765 . ?
O12 Mo02 Rb01 53.48(16) . . ?
O1 Mo02 Rb01 112.65(16) 6_657 . ?
Rb04 Mo02 Rb01 72.329(19) . . ?
Rb03 Mo02 Rb01 175.86(2) 1_655 . ?
O4 Mo02 Rb02 54.56(16) 7_765 5_777 ?
O11 Mo02 Rb02 55.61(16) 7_765 5_777 ?
O12 Mo02 Rb02 136.22(14) . 5_777 ?
O1 Mo02 Rb02 114.06(16) 6_657 5_777 ?
Rb04 Mo02 Rb02 178.56(2) . 5_777 ?
Rb03 Mo02 Rb02 76.13(2) 1_655 5_777 ?
Rb01 Mo02 Rb02 107.82(2) . 5_777 ?
O4 Mo02 Rb01 56.58(16) 7_765 7_755 ?
O11 Mo02 Rb01 141.58(14) 7_765 7_755 ?
O12 Mo02 Rb01 56.90(16) . 7_755 ?
O1 Mo02 Rb01 107.68(16) 6_657 7_755 ?
Rb04 Mo02 Rb01 74.145(17) . 7_755 ?
Rb03 Mo02 Rb01 70.053(17) 1_655 7_755 ?
Rb01 Mo02 Rb01 107.189(18) . 7_755 ?
Rb02 Mo02 Rb01 107.088(19) 5_777 7_755 ?
O4 Mo02 Rb04 122.87(17) 7_765 7_765 ?
O11 Mo02 Rb04 37.74(14) 7_765 7_765 ?
O12 Mo02 Rb04 123.37(16) . 7_765 ?
O1 Mo02 Rb04 72.99(16) 6_657 7_765 ?
Rb04 Mo02 Rb04 106.581(18) . 7_765 ?
Rb03 Mo02 Rb04 109.976(19) 1_655 7_765 ?
Rb01 Mo02 Rb04 72.826(17) . 7_765 ?
Rb02 Mo02 Rb04 72.190(16) 5_777 7_765 ?
Rb01 Mo02 Rb04 179.21(2) 7_755 7_765 ?
O9 Mo03 O2 109.1(2) . . ?
O9 Mo03 O5 108.6(2) . . ?
O2 Mo03 O5 108.2(2) . . ?
O9 Mo03 O6 109.9(2) . 7_655 ?
O2 Mo03 O6 111.5(2) . 7_655 ?
O5 Mo03 O6 109.4(2) . 7_655 ?
O9 Mo03 Rb03 61.53(16) . 6_657 ?
O2 Mo03 Rb03 50.14(15) . 6_657 ?
O5 Mo03 Rb03 108.36(15) . 6_657 ?
O6 Mo03 Rb03 141.88(16) 7_655 6_657 ?
O9 Mo03 Rb04 62.43(16) . 4_646 ?
O2 Mo03 Rb04 112.54(16) . 4_646 ?
O5 Mo03 Rb04 138.97(15) . 4_646 ?
O6 Mo03 Rb04 50.14(15) 7_655 4_646 ?
Rb03 Mo03 Rb04 101.439(19) 6_657 4_646 ?
O9 Mo03 Rb04 68.99(16) . 6_557 ?
O2 Mo03 Rb04 136.99(16) . 6_557 ?
O5 Mo03 Rb04 42.77(14) . 6_557 ?
O6 Mo03 Rb04 108.91(16) 7_655 6_557 ?
Rb03 Mo03 Rb04 102.13(2) 6_657 6_557 ?
Rb04 Mo03 Rb04 104.214(18) 4_646 6_557 ?
O9 Rb01 O8 136.77(14) 4_656 5_677 ?
O9 Rb01 O4 133.59(14) 4_656 5_667 ?
O8 Rb01 O4 75.06(13) 5_677 5_667 ?
O9 Rb01 O7 143.03(13) 4_656 3_567 ?
O8 Rb01 O7 68.97(13) 5_677 3_567 ?
O4 Rb01 O7 69.58(14) 5_667 3_567 ?
O9 Rb01 O12 77.16(12) 4_656 . ?
O8 Rb01 O12 136.63(13) 5_677 . ?
O4 Rb01 O12 100.71(13) 5_667 . ?
O7 Rb01 O12 69.26(12) 3_567 . ?
O9 Rb01 O11 75.92(13) 4_656 7_765 ?
O8 Rb01 O11 102.26(13) 5_677 7_765 ?
O4 Rb01 O11 139.43(12) 5_667 7_765 ?
O7 Rb01 O11 71.82(12) 3_567 7_765 ?
O12 Rb01 O11 53.16(12) . 7_765 ?
O9 Rb01 O4 74.03(12) 4_656 1_565 ?
O8 Rb01 O4 66.66(12) 5_677 1_565 ?
O4 Rb01 O4 104.17(11) 5_667 1_565 ?
O7 Rb01 O4 135.18(13) 3_567 1_565 ?
O12 Rb01 O4 150.32(11) . 1_565 ?
O11 Rb01 O4 111.80(11) 7_765 1_565 ?
O9 Rb01 O12 78.18(12) 4_656 7_765 ?
O8 Rb01 O12 63.70(12) 5_677 7_765 ?
O4 Rb01 O12 137.64(12) 5_667 7_765 ?
O7 Rb01 O12 102.36(13) 3_567 7_765 ?
O12 Rb01 O12 115.46(6) . 7_765 ?
O11 Rb01 O12 63.30(11) 7_765 7_765 ?
O4 Rb01 O12 51.42(12) 1_565 7_765 ?
O9 Rb01 O10 75.27(13) 4_656 . ?
O8 Rb01 O10 137.34(13) 5_677 . ?
O4 Rb01 O10 63.19(12) 5_667 . ?
O7 Rb01 O10 102.32(13) 3_567 . ?
O12 Rb01 O10 63.94(12) . . ?
O11 Rb01 O10 114.75(11) 7_765 . ?
O4 Rb01 O10 114.27(12) 1_565 . ?
O12 Rb01 O10 152.81(11) 7_765 . ?
O9 Rb01 O8 72.54(12) 4_656 . ?
O8 Rb01 O8 104.68(11) 5_677 . ?
O4 Rb01 O8 65.70(12) 5_667 . ?
O7 Rb01 O8 134.79(13) 3_567 . ?
O12 Rb01 O8 112.73(12) . . ?
O11 Rb01 O8 147.90(12) 7_765 . ?
O4 Rb01 O8 64.82(11) 1_565 . ?
O12 Rb01 O8 114.78(12) 7_765 . ?
O10 Rb01 O8 50.94(11) . . ?
O9 Rb01 Rb02 112.70(10) 4_656 . ?
O8 Rb01 Rb02 53.69(10) 5_677 . ?
O4 Rb01 Rb02 113.71(9) 5_667 . ?
O7 Rb01 Rb02 55.52(11) 3_567 . ?
O12 Rb01 Rb02 92.47(9) . . ?
O11 Rb01 Rb02 48.64(8) 7_765 . ?
O4 Rb01 Rb02 92.12(8) 1_565 . ?
O12 Rb01 Rb02 47.02(8) 7_765 . ?
O10 Rb01 Rb02 153.56(8) . . ?
O8 Rb01 Rb02 154.67(8) . . ?
O9 Rb01 Mo02 70.01(10) 4_656 . ?
O8 Rb01 Mo02 125.31(10) 5_677 . ?
O4 Rb01 Mo02 124.96(10) 5_667 . ?
O7 Rb01 Mo02 73.04(9) 3_567 . ?
O12 Rb01 Mo02 26.88(9) . . ?
O11 Rb01 Mo02 27.11(7) 7_765 . ?
O4 Rb01 Mo02 130.75(8) 1_565 . ?
O12 Rb01 Mo02 88.59(8) 7_765 . ?
O10 Rb01 Mo02 87.84(8) . . ?
O8 Rb01 Mo02 129.97(8) . . ?
Rb02 Rb01 Mo02 72.623(19) . . ?
O10 Rb02 O12 72.87(14) 7_765 7_765 ?
O10 Rb02 O11 69.59(13) 7_765 7_765 ?
O12 Rb02 O11 72.21(13) 7_765 7_765 ?
O10 Rb02 O8 138.23(13) 7_765 5_677 ?
O12 Rb02 O8 66.11(13) 7_765 5_677 ?
O11 Rb02 O8 103.79(13) 7_765 5_677 ?
O10 Rb02 O10 100.23(12) 7_765 3_567 ?
O12 Rb02 O10 137.28(13) 7_765 3_567 ?
O11 Rb02 O10 66.13(12) 7_765 3_567 ?
O8 Rb02 O10 114.91(12) 5_677 3_567 ?
O10 Rb02 O4 65.90(13) 7_765 3_567 ?
O12 Rb02 O4 100.78(13) 7_765 3_567 ?
O11 Rb02 O4 134.89(13) 7_765 3_567 ?
O8 Rb02 O4 113.90(12) 5_677 3_567 ?
O10 Rb02 O4 114.93(12) 3_567 3_567 ?
O10 Rb02 O11 66.63(13) 7_765 3_567 ?
O12 Rb02 O11 138.06(13) 7_765 3_567 ?
O11 Rb02 O11 102.39(11) 7_765 3_567 ?
O8 Rb02 O11 149.54(12) 5_677 3_567 ?
O10 Rb02 O11 63.08(12) 3_567 3_567 ?
O4 Rb02 O11 52.92(11) 3_567 3_567 ?
O10 Rb02 O7 140.15(13) 7_765 3_567 ?
O12 Rb02 O7 106.39(13) 7_765 3_567 ?
O11 Rb02 O7 72.40(12) 7_765 3_567 ?
O8 Rb02 O7 63.10(12) 5_677 3_567 ?
O10 Rb02 O7 52.39(13) 3_567 3_567 ?
O4 Rb02 O7 147.11(12) 3_567 3_567 ?
O11 Rb02 O7 111.40(12) 3_567 3_567 ?
O10 Rb02 O7 105.39(13) 7_765 5_677 ?
O12 Rb02 O7 67.88(12) 7_765 5_677 ?
O11 Rb02 O7 139.20(12) 7_765 5_677 ?
O8 Rb02 O7 51.93(12) 5_677 5_677 ?
O10 Rb02 O7 149.37(12) 3_567 5_677 ?
O4 Rb02 O7 62.94(12) 3_567 5_677 ?
O11 Rb02 O7 112.67(12) 3_567 5_677 ?
O7 Rb02 O7 111.05(7) 3_567 5_677 ?
O10 Rb02 Rb01 113.13(10) 7_765 . ?
O12 Rb02 Rb01 57.00(10) 7_765 . ?
O11 Rb02 Rb01 55.69(10) 7_765 . ?
O8 Rb02 Rb01 48.18(9) 5_677 . ?
O10 Rb02 Rb01 90.72(9) 3_567 . ?
O4 Rb02 Rb01 154.30(9) 3_567 . ?
O11 Rb02 Rb01 152.33(8) 3_567 . ?
O7 Rb02 Rb01 49.59(8) 3_567 . ?
O7 Rb02 Rb01 94.35(9) 5_677 . ?
O10 Rb02 Mo02 67.37(10) 7_765 5_777 ?
O12 Rb02 Mo02 123.98(10) 7_765 5_777 ?
O11 Rb02 Mo02 124.10(10) 7_765 5_777 ?
O8 Rb02 Mo02 132.08(9) 5_677 5_777 ?
O10 Rb02 Mo02 88.33(9) 3_567 5_777 ?
O4 Rb02 Mo02 26.64(9) 3_567 5_777 ?
O11 Rb02 Mo02 26.86(8) 3_567 5_777 ?
O7 Rb02 Mo02 129.46(9) 3_567 5_777 ?
O7 Rb02 Mo02 86.32(9) 5_677 5_777 ?
Rb01 Rb02 Mo02 179.00(2) . 5_777 ?
O10 Rb02 Mo01 124.27(10) 7_765 3_567 ?
O12 Rb02 Mo01 127.79(10) 7_765 3_567 ?
O11 Rb02 Mo01 70.95(8) 7_765 3_567 ?
O8 Rb02 Mo01 88.47(9) 5_677 3_567 ?
O10 Rb02 Mo01 26.44(9) 3_567 3_567 ?
O4 Rb02 Mo01 131.42(9) 3_567 3_567 ?
O11 Rb02 Mo01 85.57(8) 3_567 3_567 ?
O7 Rb02 Mo01 26.56(9) 3_567 3_567 ?
O7 Rb02 Mo01 130.13(8) 5_677 3_567 ?
Rb01 Rb02 Mo01 71.848(17) . 3_567 ?
Mo02 Rb02 Mo01 107.150(19) 5_777 3_567 ?
O4 Rb03 O8 78.26(14) 7_665 7_655 ?
O4 Rb03 O7 73.24(15) 7_665 . ?
O8 Rb03 O7 72.12(13) 7_655 . ?
O4 Rb03 O2 121.14(14) 7_665 6_557 ?
O8 Rb03 O2 111.27(13) 7_655 6_557 ?
O7 Rb03 O2 165.43(14) . 6_557 ?
O4 Rb03 O5 156.91(14) 7_665 . ?
O8 Rb03 O5 108.46(14) 7_655 . ?
O7 Rb03 O5 87.59(14) . . ?
O2 Rb03 O5 77.88(13) 6_557 . ?
O4 Rb03 O6 104.69(13) 7_665 . ?
O8 Rb03 O6 155.09(15) 7_655 . ?
O7 Rb03 O6 84.91(14) . . ?
O2 Rb03 O6 88.70(13) 6_557 . ?
O5 Rb03 O6 59.86(13) . . ?
O4 Rb03 O9 75.60(13) 7_665 6_557 ?
O8 Rb03 O9 74.77(13) 7_655 6_557 ?
O7 Rb03 O9 138.17(12) . 6_557 ?
O2 Rb03 O9 54.32(12) 6_557 6_557 ?
O5 Rb03 O9 127.29(12) . 6_557 ?
O6 Rb03 O9 130.12(13) . 6_557 ?
O4 Rb03 O3 119.00(13) 7_665 7_655 ?
O8 Rb03 O3 53.64(12) 7_655 7_655 ?
O7 Rb03 O3 115.90(13) . 7_655 ?
O2 Rb03 O3 60.99(12) 6_557 7_655 ?
O5 Rb03 O3 80.66(12) . 7_655 ?
O6 Rb03 O3 135.10(12) . 7_655 ?
O9 Rb03 O3 58.71(12) 6_557 7_655 ?
O4 Rb03 O1 53.02(12) 7_665 6_557 ?
O8 Rb03 O1 121.07(13) 7_655 6_557 ?
O7 Rb03 O1 114.70(14) . 6_557 ?
O2 Rb03 O1 76.34(12) 6_557 6_557 ?
O5 Rb03 O1 129.60(12) . 6_557 ?
O6 Rb03 O1 76.96(13) . 6_557 ?
O9 Rb03 O1 63.66(12) 6_557 6_557 ?
O3 Rb03 O1 120.96(12) 7_655 6_557 ?
O4 Rb03 Zn01 125.47(10) 7_665 . ?
O8 Rb03 Zn01 126.05(11) 7_655 . ?
O7 Rb03 Zn01 71.46(9) . . ?
O2 Rb03 Zn01 96.26(9) 6_557 . ?
O5 Rb03 Zn01 32.85(9) . . ?
O6 Rb03 Zn01 32.87(10) . . ?
O9 Rb03 Zn01 150.36(8) 6_557 . ?
O3 Rb03 Zn01 113.40(8) 7_655 . ?
O1 Rb03 Zn01 109.82(8) 6_557 . ?
O4 Rb03 Mo03 96.16(10) 7_665 6_557 ?
O8 Rb03 Mo03 97.32(10) 7_655 6_557 ?
O7 Rb03 Mo03 166.14(9) . 6_557 ?
O2 Rb03 Mo03 27.27(9) 6_557 6_557 ?
O5 Rb03 Mo03 104.59(9) . 6_557 ?
O6 Rb03 Mo03 106.80(10) . 6_557 ?
O9 Rb03 Mo03 27.99(8) 6_557 6_557 ?
O3 Rb03 Mo03 60.94(8) 7_655 6_557 ?
O1 Rb03 Mo03 62.51(8) 6_557 6_557 ?
Zn01 Rb03 Mo03 122.40(2) . 6_557 ?
O4 Rb03 Mo01 97.75(10) 7_665 7_655 ?
O8 Rb03 Mo01 25.26(9) 7_655 7_655 ?
O7 Rb03 Mo01 92.98(10) . 7_655 ?
O2 Rb03 Mo01 87.49(9) 6_557 7_655 ?
O5 Rb03 Mo01 95.95(9) . 7_655 ?
O6 Rb03 Mo01 155.76(10) . 7_655 ?
O9 Rb03 Mo01 64.34(9) 6_557 7_655 ?
O3 Rb03 Mo01 28.38(7) 7_655 7_655 ?
O1 Rb03 Mo01 125.07(8) 6_557 7_655 ?
Zn01 Rb03 Mo01 124.08(2) . 7_655 ?
Mo03 Rb03 Mo01 79.375(18) 6_557 7_655 ?
O2 Rb04 O11 92.21(13) . . ?
O2 Rb04 O12 166.33(13) . . ?
O11 Rb04 O12 74.55(13) . . ?
O2 Rb04 O10 105.90(14) . . ?
O11 Rb04 O10 71.55(13) . . ?
O12 Rb04 O10 73.54(14) . . ?
O2 Rb04 O5 77.97(13) . 6_657 ?
O11 Rb04 O5 110.15(13) . 6_657 ?
O12 Rb04 O5 103.07(13) . 6_657 ?
O10 Rb04 O5 175.83(14) . 6_657 ?
O2 Rb04 O6 87.60(12) . 6_657 ?
O11 Rb04 O6 167.39(13) . 6_657 ?
O12 Rb04 O6 104.56(13) . 6_657 ?
O10 Rb04 O6 120.60(13) . 6_657 ?
O5 Rb04 O6 57.49(13) 6_657 6_657 ?
O2 Rb04 O3 73.47(13) . . ?
O11 Rb04 O3 116.24(13) . . ?
O12 Rb04 O3 115.16(13) . . ?
O10 Rb04 O3 55.23(12) . . ?
O5 Rb04 O3 125.55(12) 6_657 . ?
O6 Rb04 O3 75.77(12) 6_657 . ?
O2 Rb04 O1 132.08(13) . 6_657 ?
O11 Rb04 O1 114.28(13) . 6_657 ?
O12 Rb04 O1 54.13(12) . 6_657 ?
O10 Rb04 O1 119.80(13) . 6_657 ?
O5 Rb04 O1 56.06(12) 6_657 6_657 ?
O6 Rb04 O1 58.05(12) 6_657 6_657 ?
O3 Rb04 O1 121.02(12) . 6_657 ?
O2 Rb04 O9 121.42(12) . 4_656 ?
O11 Rb04 O9 136.52(11) . 4_656 ?
O12 Rb04 O9 71.85(12) . 4_656 ?
O10 Rb04 O9 73.04(12) . 4_656 ?
O5 Rb04 O9 103.74(12) 6_657 4_656 ?
O6 Rb04 O9 52.02(11) 6_657 4_656 ?
O3 Rb04 O9 58.13(11) . 4_656 ?
O1 Rb04 O9 64.69(12) 6_657 4_656 ?
O2 Rb04 Zn01 101.38(10) . 6_657 ?
O11 Rb04 Zn01 133.91(10) . 6_657 ?
O12 Rb04 Zn01 85.93(10) . 6_657 ?
O10 Rb04 Zn01 141.71(10) . 6_657 ?
O5 Rb04 Zn01 34.53(9) 6_657 6_657 ?
O6 Rb04 Zn01 34.38(9) 6_657 6_657 ?
O3 Rb04 Zn01 109.84(8) . 6_657 ?
O1 Rb04 Zn01 31.82(8) 6_657 6_657 ?
O9 Rb04 Zn01 69.93(8) 4_656 6_657 ?
O2 Rb04 Mo01 90.23(10) . . ?
O11 Rb04 Mo01 92.89(9) . . ?
O12 Rb04 Mo01 93.77(10) . . ?
O10 Rb04 Mo01 26.35(9) . . ?
O5 Rb04 Mo01 154.27(9) 6_657 . ?
O6 Rb04 Mo01 99.72(9) 6_657 . ?
O3 Rb04 Mo01 28.88(8) . . ?
O1 Rb04 Mo01 125.03(9) 6_657 . ?
O9 Rb04 Mo01 63.04(8) 4_656 . ?
Zn01 Rb04 Mo01 130.34(3) 6_657 . ?
O2 Rb04 Mo02 158.55(10) . . ?
O11 Rb04 Mo02 94.15(10) . . ?
O12 Rb04 Mo02 25.86(9) . . ?
O10 Rb04 Mo02 95.54(10) . . ?
O5 Rb04 Mo02 80.60(9) 6_657 . ?
O6 Rb04 Mo02 81.79(9) 6_657 . ?
O3 Rb04 Mo02 121.14(8) . . ?
O1 Rb04 Mo02 28.29(8) 6_657 . ?
O9 Rb04 Mo02 65.07(8) 4_656 . ?
Zn01 Rb04 Mo02 60.078(19) 6_657 . ?
Mo01 Rb04 Mo02 109.85(2) . . ?
O3 Zn01 O1 126.3(2) . . ?
O3 Zn01 O6 110.1(2) . . ?
O1 Zn01 O6 109.5(2) . . ?
O3 Zn01 O5 108.69(19) . . ?
O1 Zn01 O5 103.00(19) . . ?
O6 Zn01 O5 94.28(19) . . ?
O3 Zn01 Rb04 160.92(15) . 6_557 ?
O1 Zn01 Rb04 72.39(15) . 6_557 ?
O6 Zn01 Rb04 60.91(14) . 6_557 ?
O5 Zn01 Rb04 58.24(13) . 6_557 ?
O3 Zn01 Rb03 91.80(14) . . ?
O1 Zn01 Rb03 141.46(15) . . ?
O6 Zn01 Rb03 53.29(13) . . ?
O5 Zn01 Rb03 52.40(13) . . ?
Rb04 Zn01 Rb03 69.26(2) 6_557 . ?
Mo02 O1 Zn01 162.4(3) 6_557 . ?
Mo02 O1 Rb04 87.01(17) 6_557 6_557 ?
Zn01 O1 Rb04 75.78(15) . 6_557 ?
Mo02 O1 Rb03 85.90(17) 6_557 6_657 ?
Zn01 O1 Rb03 105.53(19) . 6_657 ?
Rb04 O1 Rb03 119.48(14) 6_557 6_657 ?
Mo03 O2 Rb04 150.4(2) . . ?
Mo03 O2 Rb03 102.59(19) . 6_657 ?
Rb04 O2 Rb03 91.27(13) . 6_657 ?
Mo01 O3 Zn01 138.1(3) . . ?
Mo01 O3 Rb04 89.60(17) . . ?
Zn01 O3 Rb04 115.7(2) . . ?
Mo01 O3 Rb03 86.51(16) . 7_665 ?
Zn01 O3 Rb03 105.83(18) . 7_665 ?
Rb04 O3 Rb03 120.16(14) . 7_665 ?
Mo02 O4 Rb03 112.0(2) 7_755 7_655 ?
Mo02 O4 Rb01 153.5(2) 7_755 5_667 ?
Rb03 O4 Rb01 93.99(14) 7_655 5_667 ?
Mo02 O4 Rb02 98.80(19) 7_755 3_467 ?
Rb03 O4 Rb02 104.28(15) 7_655 3_467 ?
Rb01 O4 Rb02 78.48(12) 5_667 3_467 ?
Mo02 O4 Rb01 97.2(2) 7_755 1_545 ?
Rb03 O4 Rb01 93.01(13) 7_655 1_545 ?
Rb01 O4 Rb01 75.83(11) 5_667 1_545 ?
Rb02 O4 Rb01 149.86(16) 3_467 1_545 ?
Mo03 O5 Zn01 121.6(3) . . ?
Mo03 O5 Rb03 137.7(2) . . ?
Zn01 O5 Rb03 94.75(17) . . ?
Mo03 O5 Rb04 113.07(19) . 6_557 ?
Zn01 O5 Rb04 87.23(16) . 6_557 ?
Rb03 O5 Rb04 87.44(13) . 6_557 ?
Mo03 O6 Zn01 123.3(2) 7_665 . ?
Mo03 O6 Rb03 142.3(2) 7_665 . ?
Zn01 O6 Rb03 93.84(16) . . ?
Mo03 O6 Rb04 103.17(19) 7_665 6_557 ?
Zn01 O6 Rb04 84.71(15) . 6_557 ?
Rb03 O6 Rb04 85.19(12) . 6_557 ?
Mo01 O7 Rb03 127.1(2) . . ?
Mo01 O7 Rb01 141.7(2) . 3_467 ?
Rb03 O7 Rb01 91.14(13) . 3_467 ?
Mo01 O7 Rb02 96.3(2) . 3_467 ?
Rb03 O7 Rb02 100.70(14) . 3_467 ?
Rb01 O7 Rb02 74.89(11) 3_467 3_467 ?
Mo01 O7 Rb02 95.4(2) . 5_677 ?
Rb03 O7 Rb02 99.09(15) . 5_677 ?
Rb01 O7 Rb02 74.88(11) 3_467 5_677 ?
Rb02 O7 Rb02 143.95(15) 3_467 5_677 ?
Mo01 O8 Rb03 110.9(2) . 7_665 ?
Mo01 O8 Rb01 153.7(2) . 5_677 ?
Rb03 O8 Rb01 94.29(14) 7_665 5_677 ?
Mo01 O8 Rb02 101.9(2) . 5_677 ?
Rb03 O8 Rb02 104.64(15) 7_665 5_677 ?
Rb01 O8 Rb02 78.13(11) 5_677 5_677 ?
Mo01 O8 Rb01 95.62(19) . . ?
Rb03 O8 Rb01 91.75(13) 7_665 . ?
Rb01 O8 Rb01 75.32(11) 5_677 . ?
Rb02 O8 Rb01 149.69(15) 5_677 . ?
Mo03 O9 Rb01 173.6(3) . 4_646 ?
Mo03 O9 Rb03 90.48(18) . 6_657 ?
Rb01 O9 Rb03 93.68(13) 4_646 6_657 ?
Mo03 O9 Rb04 91.35(18) . 4_646 ?
Rb01 O9 Rb04 90.53(12) 4_646 4_646 ?
Rb03 O9 Rb04 122.50(15) 6_657 4_646 ?
Mo01 O10 Rb04 107.2(2) . . ?
Mo01 O10 Rb02 157.6(2) . 7_755 ?
Rb04 O10 Rb02 94.75(14) . 7_755 ?
Mo01 O10 Rb02 100.0(2) . 3_467 ?
Rb04 O10 Rb02 100.75(14) . 3_467 ?
Rb02 O10 Rb02 79.77(12) 7_755 3_467 ?
Mo01 O10 Rb01 96.65(19) . . ?
Rb04 O10 Rb01 93.62(14) . . ?
Rb02 O10 Rb01 77.09(12) 7_755 . ?
Rb02 O10 Rb01 153.63(16) 3_467 . ?
Mo02 O11 Rb04 120.0(2) 7_755 . ?
Mo02 O11 Rb02 147.0(2) 7_755 7_755 ?
Rb04 O11 Rb02 92.90(12) . 7_755 ?
Mo02 O11 Rb02 97.53(18) 7_755 3_467 ?
Rb04 O11 Rb02 100.00(14) . 3_467 ?
Rb02 O11 Rb02 77.61(11) 7_755 3_467 ?
Mo02 O11 Rb01 94.92(18) 7_755 7_755 ?
Rb04 O11 Rb01 99.40(13) . 7_755 ?
Rb02 O11 Rb01 75.67(10) 7_755 7_755 ?
Rb02 O11 Rb01 147.56(15) 3_467 7_755 ?
Mo02 O12 Rb04 109.10(19) . . ?
Mo02 O12 Rb02 156.3(2) . 7_755 ?
Rb04 O12 Rb02 94.30(14) . 7_755 ?
Mo02 O12 Rb01 99.64(19) . . ?
Rb04 O12 Rb01 97.86(14) . . ?
Rb02 O12 Rb01 80.02(12) 7_755 . ?
Mo02 O12 Rb01 96.66(19) . 7_755 ?
Rb04 O12 Rb01 98.07(13) . 7_755 ?
Rb02 O12 Rb01 75.97(10) 7_755 7_755 ?
Rb01 O12 Rb01 152.02(15) . 7_755 ?
 
_diffrn_measured_fraction_theta_max    1.000
_diffrn_reflns_theta_full              30.02
_diffrn_measured_fraction_theta_full   1.000
_refine_diff_density_max    2.495
_refine_diff_density_min   -1.940
_refine_diff_density_rms    0.317
